# Supplementary material
Source: PubMed Central journal article supplement (PMC4789104)
Supplement: NIHMS764546-supplement-ESI.pdf [file NIHMS764546-supplement-ESI.pdf]

**Table S11** Differentially expressed genes between *E. coli*  $\Delta aceA_1 \Delta pgi_2$  and *E. coli*  $\Delta pgi_1 \Delta aceA_2$  mutants with q-values < 0.05

| Name        | <i>E. coli</i> $\Delta aceA_1 \Delta pgi_2$ | <i>E. coli</i> $\Delta pgi_1 \Delta aceA_2$ | Product                                                                    |
|-------------|---------------------------------------------|---------------------------------------------|----------------------------------------------------------------------------|
| <i>arpA</i> | 53                                          | 1                                           | ankyrin repeat protein                                                     |
| <i>yjbB</i> | 75                                          | 2                                           | putative Na <sup>+</sup> /Pi-cotransporter                                 |
| <i>rluF</i> | 75                                          | 1                                           | 23S rRNA pseudouridine(2604) synthase                                      |
| <i>iclR</i> | 74                                          | 3                                           | transcriptional repressor                                                  |
| <i>pepE</i> | 59                                          | 2                                           | (alpha)-aspartyl dipeptidase                                               |
| -           | 264                                         | 5                                           | antisense: lysC                                                            |
| <i>yjbD</i> | 79                                          | 1                                           | DUF3811 family protein                                                     |
| <i>lysC</i> | 243                                         | 4                                           | lysine-sensitive aspartokinase 3                                           |
| <i>metH</i> | 94                                          | 3                                           | homocysteine-N5-methyltetrahydrofolate transmethylase, B12-dependent       |
| <i>aceK</i> | 85                                          | 2                                           | isocitrate dehydrogenase kinase/phosphatase                                |
| <i>pgi</i>  | 1                                           | 7                                           | glucosephosphate isomerase                                                 |
| -           | 213                                         | 1570                                        | -                                                                          |
| <i>ynbG</i> | 30                                          | 14                                          | uncharacterized protein                                                    |
| <i>aceA</i> | 2                                           | 15                                          | isocitrate lyase                                                           |
| <i>rseX</i> | 35                                          | 12                                          | -                                                                          |
| <i>ydcD</i> | 39                                          | 11                                          | uncharacterized protein                                                    |
| <i>yhhH</i> | 52                                          | 15                                          | putative immunity protein for putative polymorphic toxin RhsB              |
| <i>yagF</i> | 40                                          | 12                                          | CP4-6 prophage; dehydratase family protein                                 |
| <i>yjcF</i> | 34                                          | 11                                          | pentapeptide repeats protein                                               |
| <i>ybfC</i> | 67                                          | 23                                          | putative periplasmic protein                                               |
| <i>sokA</i> | 50                                          | 23                                          | -                                                                          |
| <i>yagM</i> | 43                                          | 15                                          | CP4-6 prophage; uncharacterized protein                                    |
| <i>yibG</i> | 49                                          | 16                                          | TPR-like repeat protein                                                    |
| <i>ymfE</i> | 43                                          | 15                                          | e14 prophage; putative inner membrane protein                              |
| <i>yibA</i> | 44                                          | 16                                          | HEAT-domain lethality reduction protein; putative immunity protein for ... |
| <i>rpiB</i> | 79                                          | 29                                          | ribose 5-phosphate isomerase B/allose 6-phosphate isomerase                |
| <i>yncH</i> | 36                                          | 12                                          | IPR020099 family protein                                                   |
| <i>yagH</i> | 38                                          | 13                                          | CP4-6 prophage; putative xylosidase/arabinosidase                          |
| <i>yagL</i> | 44                                          | 16                                          | CP4-6 prophage; DNA-binding protein                                        |
| <i>ybbC</i> | 66                                          | 24                                          | putative immunity protein                                                  |
| <i>psaA</i> | 96                                          | 73                                          | -                                                                          |
| <i>yqeL</i> | 47                                          | 16                                          | uncharacterized protein                                                    |
| <i>dapB</i> | 109                                         | 366                                         | dihydrodipicolinate reductase                                              |
| <i>yhhZ</i> | 45                                          | 16                                          | putative Hcp1 family polymorphic toxin protein; putative colicin-like ...  |
| <i>phnM</i> | 39                                          | 15                                          | ribophosphonate triphosphate hydrolase                                     |
| <i>phnG</i> | 37                                          | 14                                          | ribophosphonate triphosphate synthase subunit                              |
| <i>argF</i> | 141                                         | 52                                          | ornithine carbamoyltransferase 2, chain F; CP4-6 prophage                  |
| -           | 87                                          | 69                                          | antisense: cheY                                                            |
| <i>ythA</i> | 64                                          | 26                                          | uncharacterized protein                                                    |
| -           | 756                                         | 2377                                        | antisense: ryfD                                                            |
| <i>ryfD</i> | 701                                         | 2239                                        | -                                                                          |
| <i>appY</i> | 46                                          | 19                                          | global transcriptional activator; DLP12 prophage                           |
| <i>rprA</i> | 57                                          | 26                                          | -                                                                          |
| <i>yagG</i> | 43                                          | 16                                          | CP4-6 prophage; putative sugar transporter                                 |
| <i>yjbS</i> | 51                                          | 21                                          | uncharacterized protein                                                    |
| <i>phnN</i> | 38                                          | 15                                          | ribose 1,5-bisphosphokinase                                                |
| <i>tdcR</i> | 44                                          | 18                                          | L-threonine dehydratase operon activator protein                           |
| <i>ygeG</i> | 51                                          | 22                                          | SycD-like chaperone family TPR-repeat-containing protein                   |
| <i>phnH</i> | 30                                          | 12                                          | ribophosphonate triphosphate synthase subunit                              |
| <i>ybfK</i> | 37                                          | 15                                          | uncharacterized protein                                                    |
| <i>ymfD</i> | 53                                          | 23                                          | e14 prophage; putative SAM-dependent methyltransferase                     |
